# Supplementary material for: IPR 1.0: an efficient method for calculating solar radiation absorbed by individual plants in sparse heterogeneous woody plant communities
Source: Copernicus journal article supplement (doi:10.5194/gmd-7-1357-2014), 2014-07-10
Supplement: Supplementary file 1 [file gmd-7-1357-2014-supplement.zip]

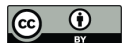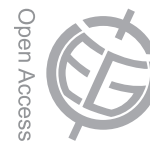

## *Supplement of*

# **IPR 1.0: an efficient method for calculating solar radiation absorbed by individual plants in sparse heterogeneous woody plant communities**

**Y. Zhang et al.**

*Correspondence to:* Y. Zhang (yu.zhang@nrcan.gc.ca)

- Supplement-Cover-Letter.pdf
- Code\_Input\_Output.txt
- IPR\_Code\_&\_Manual.doc
